# Supplementary material for: Ischemic Stroke Causes Disruptions in the Carnitine Shuttle System
Source: MDPI journal article supplement (doi:10.3390/metabo13020278), 2023-02-14
Supplement: s1 [file s1]

*Supplementary material*

# **Ischemic stroke causes disruptions in the carnitine shuttle system**

**Leonidas Mavroudak<sup>1</sup>, and Ingela Lanekoff<sup>1</sup>,\***

<sup>1</sup>Department of Chemistry – BMC, Uppsala University, 75237 Uppsala, Sweden

\*Correspondence: [Ingela.lanekoff@kemi.uu.se](mailto:Ingela.lanekoff@kemi.uu.se)

**Table S1.** MS/MS data of standards spiked in the PA nano-DESI solvent, endogenous carnitine and acylcarnitines from an ischemic mouse brain tissue section

| Precursor m/z | Detected m/z <sup>a</sup> | Characteristic fragments                                 | Assignment <sup>b</sup>                             |
|---------------|---------------------------|----------------------------------------------------------|-----------------------------------------------------|
| 165.1314      | 165.1314                  | 63.0998, 85.0287, 103.0394, 105.1106                     | L-carnitine-(methyl-d3) <sup>c</sup>                |
| 431.3920      | 431.3920                  | 60.0810, 85.0287, 144.1022, 270.2877, 372.3193           | octadecanoyl (18,18,18-D3)-L-carnitine <sup>c</sup> |
| 162.1125      | 162.1125                  | 60.0811, 85.0287, 103.0395                               | Carnitine                                           |
| 204.1230      | 204.1231                  | 60.0811, 85.0287, 145.0498                               | C2-carnitine                                        |
| 218.1387      | 218.1390                  | 60.0811, 85.0287, 144.1022                               | C3-carnitine                                        |
| 232.1543      | 232.1547                  | 60.0810, 85.0287, 173.0810                               | C4-carnitine                                        |
| 246.1700      | 246.1703                  | 60.0810, 85.0287, 187.0967                               | C5-carnitine                                        |
| 344.2795      | 344.2798                  | 60.0810, 85.0287, 285.2068                               | C12-carnitine                                       |
| 372.3110      | 372.3109                  | 60.0810, 85.0287, 211.2060, 313.2381                     | C14-carnitine                                       |
| 370.2952      | 370.2951                  | 60.0810, 85.0287                                         | C14:1-carnitine                                     |
| 400.3421      | 400.3420                  | 60.0811, 85.0287, 144.1022, 239.2375, 341.2694           | C16-carnitine                                       |
| 398.3265      | 398.3264                  | 60.0811, 85.0287                                         | C16:1-carnitine                                     |
| 428.3734      | 428.3729                  | 60.0811, 85.0287, 144.1022, 267.2688, 309.2795, 369.3006 | C18-carnitine                                       |
| 426.3578      | 426.3576                  | 60.0811, 85.0287, 144.1022, 265.2532, 367.2852           | C18:1-carnitine                                     |
| 424.3421      | 424.3420                  | 85.0287, 60.0811, 144.1022, 263.2375                     | C18:2-carnitine                                     |

<sup>a</sup>Refers to the m/z detected during the MSI experiments.

<sup>b</sup>All assignments correspond to protonated adducts.

<sup>c</sup>Standard included in the nano-DESI solvent.

**Table S2.** Number of selected ROI pixels among the analyzed tissue sections

| Sample | Ischemic area | Healthy area |
|--------|---------------|--------------|
| aa9_2  | 3368          | 3290         |
| aa9_3  | 2104          | 1550         |
| aa9_4  | 1838          | 1382         |
| bb4_3  | 1988          | 1772         |
| bb4_4  | 2236          | 1880         |
| bb5_1  | 2220          | 2377         |
| cc2_2  | 1375          | 1196         |
| cc2_3  | 1446          | 1213         |
| cc2_4  | 1256          | 1147         |
| aa6_1  | 2126          | 1850         |
| aa6_4  | 1714          | 1520         |
| bb3_2  | 1314          | 1229         |
| bb3_3  | 4112          | 3554         |
| bb3_4  | 533           | 530          |
| cc1_2  | 854           | 808          |
| cc1_4  | 854           | 808          |
| cc1_5  | 1826          | 1329         |

**Table S3.** Raw average intensities of carnitine-d3 and C18-carnitine-d3 from the healthy, ischemic and glass area obtained from one ion image. The data were used for calculating the ionization suppression magnitude shown in Fig 1b.

| Standard         | Healthy area        | Ischemic area       | Glass area          |
|------------------|---------------------|---------------------|---------------------|
| Carnitine-d3     | 2.03E+06 ± 6.25E+05 | 2.05E+06 ± 5.85E+05 | 4.90E+06 ± 5.23E+05 |
| C18-carnitine-d3 | 1.39E+06 ± 3.23E+05 | 1.42E+06 ± 3.61E+05 | 4.80E+06 ± 8.89E+05 |

**Table S4.** Ionization suppression (%) of carnitine-d3 and C18-carnitine-d3 among the healthy and ischemic region. The data are also presented in Fig. 1b and the error bars depict the propagated error due to the standard deviation of each intensity term in eq. 2 of main text.

| Standard         | Healthy area | Ischemic area |
|------------------|--------------|---------------|
| Carnitine-d3     | 58.5 ± 17.8  | 58.2 ± 17.2   |
| C18-carnitine-d3 | 71.1 ± 23.7  | 70.4 ± 23.9   |

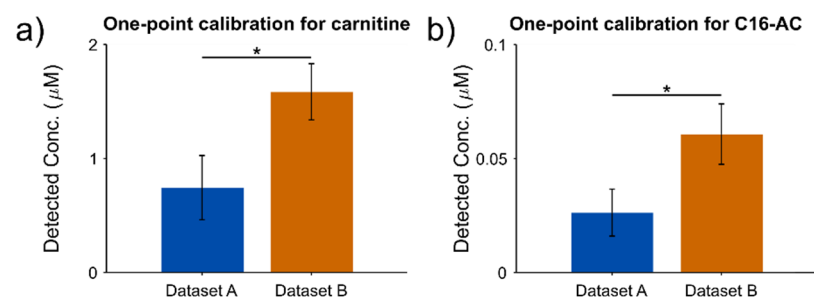

**Figure S1.** Detected concentrations of carnitine (a) and C16-carnitine (b) from two different datasets (see “Experimental Design” in SI) using one-point calibration relative quantitation. The means of the two datasets were statistically significant using a Wilcoxon rank sum test (\*p<0.05).

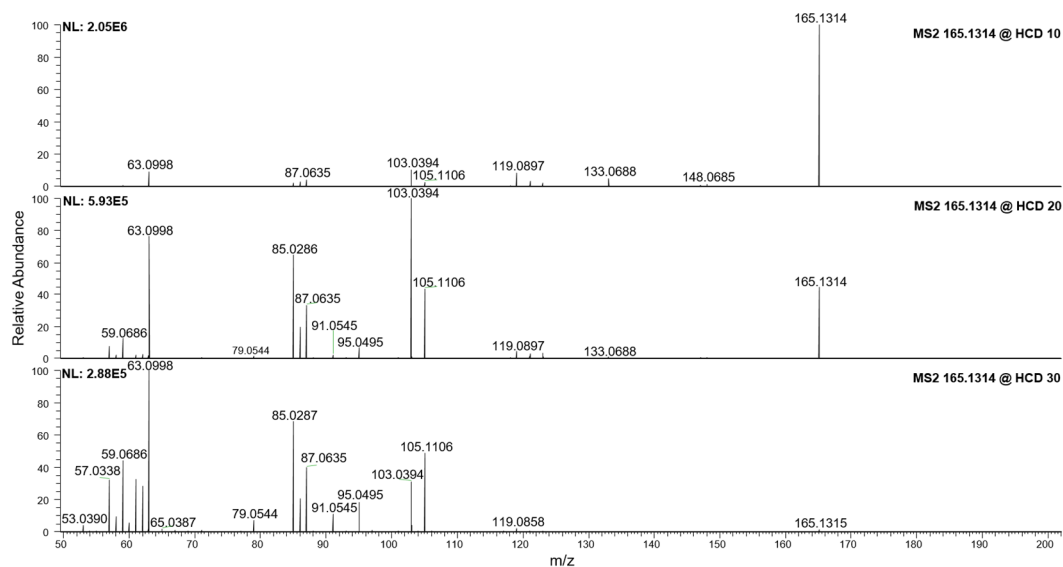

**Figure S2.** MS/MS spectra of carnitine-d3 (L-carnitine-(methyl-d3), m/z 165.1315) at various HCD levels.

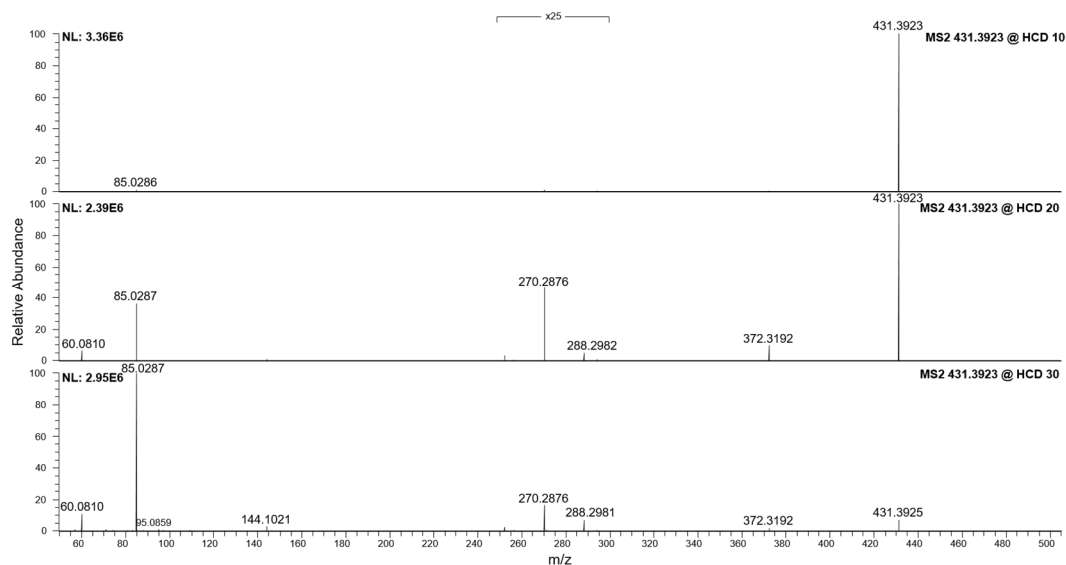

**Figure S3.** MS/MS spectra of C18-carnitine-d3 (octadecanoyl (18,18,18)-d3-L-carnitine, m/z 431.3925) at various HCD levels.

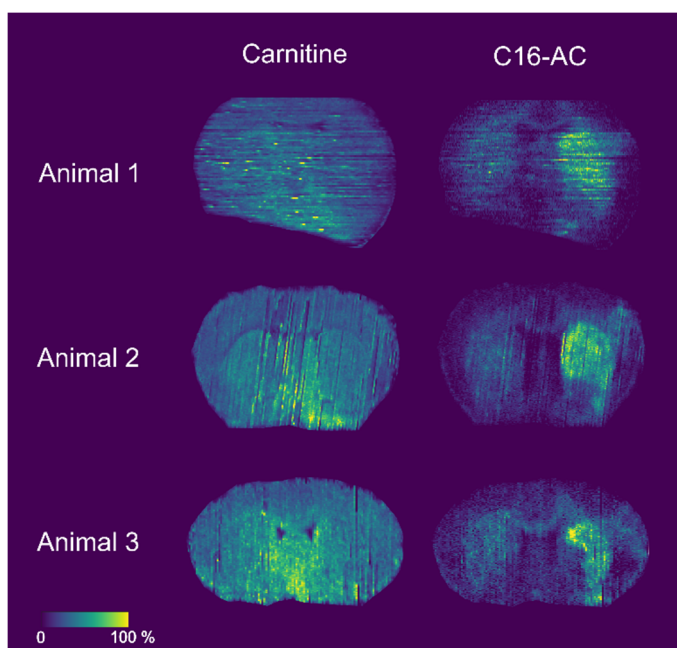

**Figure S4.** Molecular distributions of carnitine and C16-carnitine in three different tissue sections from biological replicates.

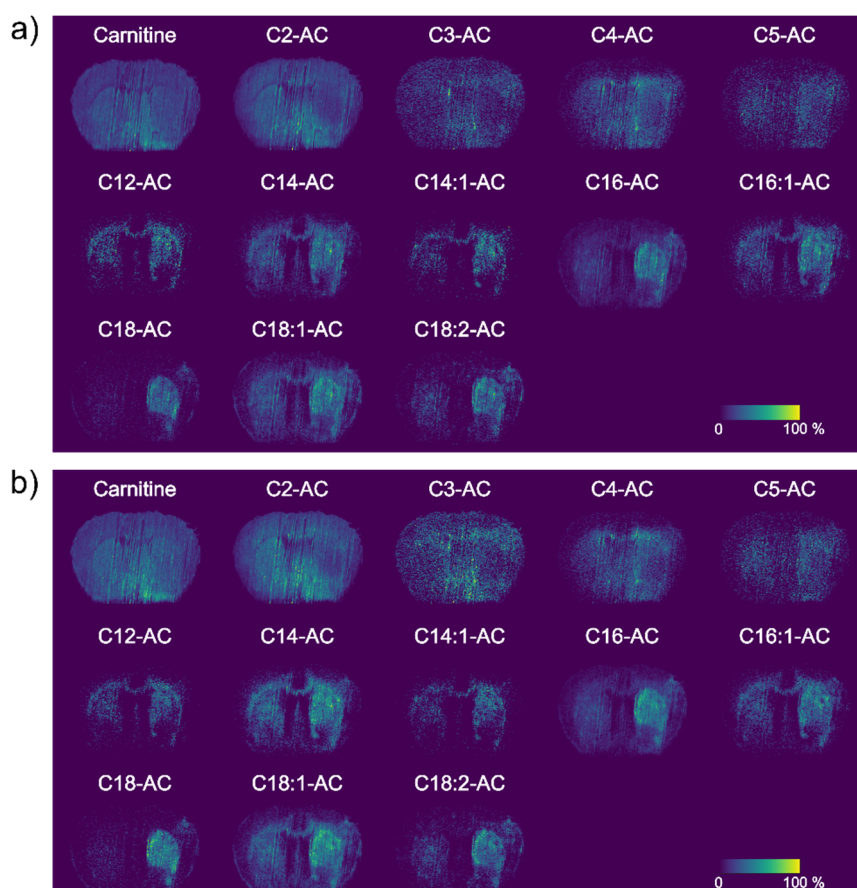

**Figure S5.** Ion images of endogenous carnitines normalized to carnitine-d3 (a) or C18-carnitine-d3 (b).

### Carnitine-d3 H<sup>+</sup> / C18-carnitine-d3 H<sup>+</sup>

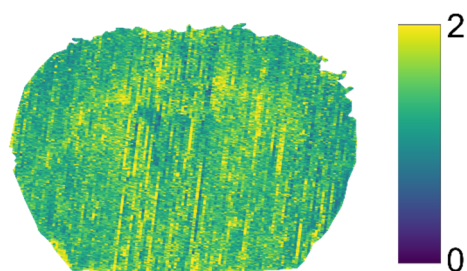

**Figure S6.** Image depicting the ratio of carnitine-d3 / c18-carnitine-d3 as protonated adducts.

### PC 22:0 K<sup>+</sup> / PC 22:0 Na<sup>+</sup>

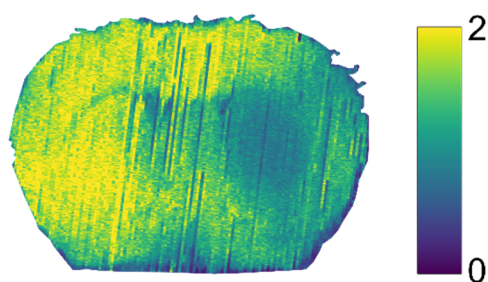

**Figure S7.** Image depicting the ratio of PC 22:0 K<sup>+</sup> / PC 22:0 Na<sup>+</sup>. The ischemic area is identified by the decreased ratio of K<sup>+</sup>/Na<sup>+</sup> adduct distribution on the right part.

**Table S5.** Average ( $\pm$  standard deviation) fold change of acylcarnitines that show accumulation in the ischemic area.

| Acylcarnitine | Average fold change |
|---------------|---------------------|
| C14-AC        | $1.26 \pm 0.22$     |
| C16-AC        | $2.10 \pm 0.13$     |
| C18-AC        | $2.31 \pm 0.27$     |
| C18:1-AC      | $1.55 \pm 0.12$     |
| C18:2-AC      | $1.55 \pm 0.25$     |

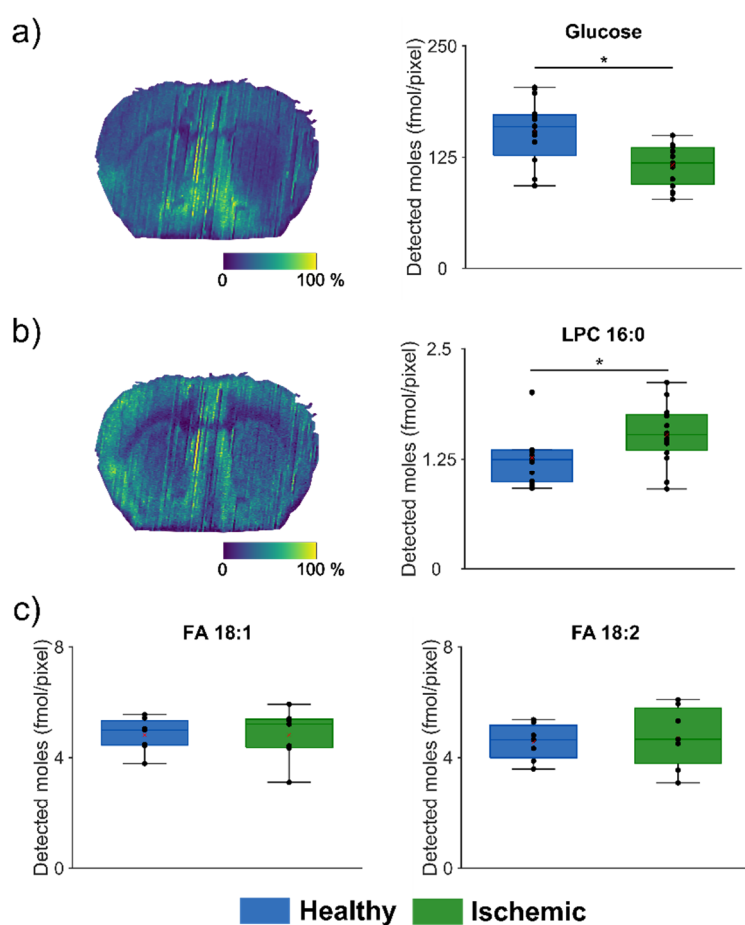

**Figure S8.** A) Ion image of glucose normalized to glucose-d2 depicted as sodiated adduct and ROI analysis. B) Ion image of lysophosphatidylcholine (LPC) 16:0 normalized to phosphatidylcholine (PC) 22:0, depicted as sodiated adduct and ROI analysis. C) ROI analysis of fatty acid (FA) 18:1 and 18:2 as sodiated adducts and normalized to oleic acid-d9.

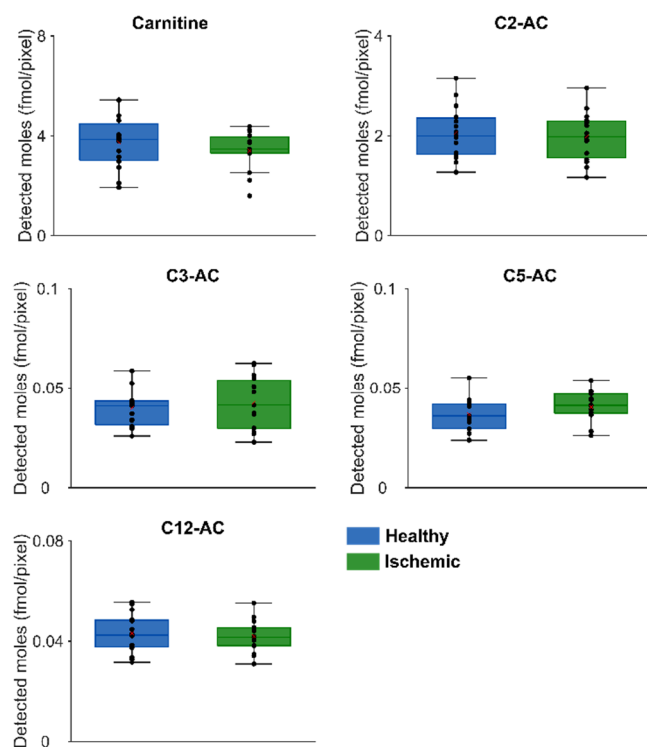

**Figure S9.** ROI analysis of ischemic and healthy region in MCAO mouse brain. Shown are the detected moles of carnitine, C2 carnitine, C3 carnitine, C5 carnitine and C12 carnitine. The two regions were not found to have statistically significant different means when using a two-tailed Wilcoxon rank sum test.

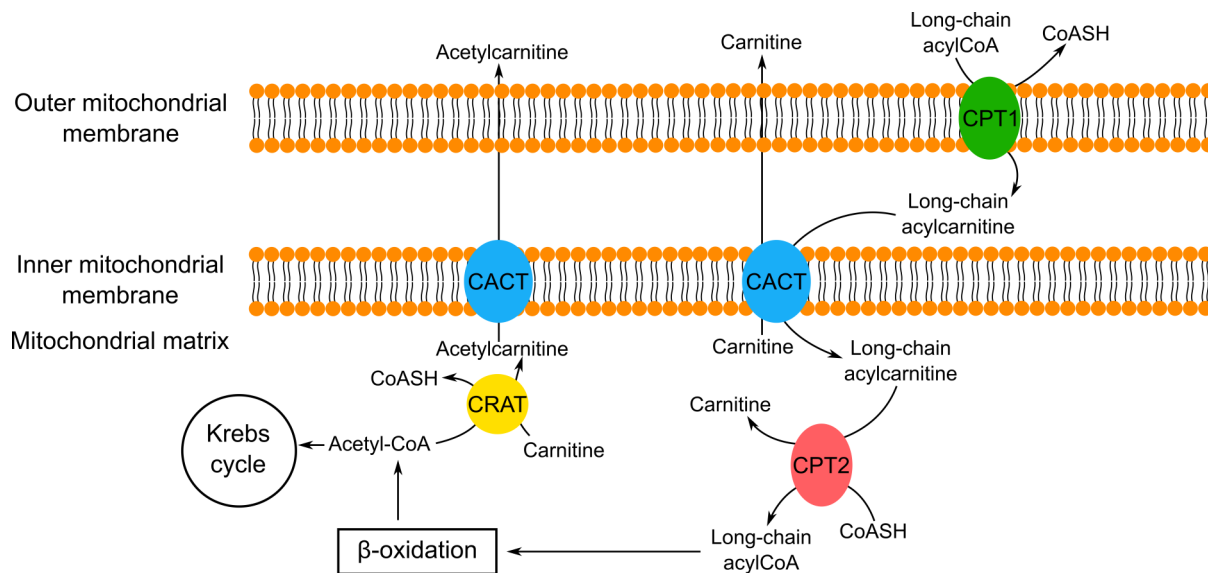

**Figure S10.** Schematic overview of the carnitine shuttle system. CPT1: carnitine palmitoyltransferase 1, CPT2: carnitine palmitoyltransferase 2, CACT: carnitine-acylcarnitine translocase, CRAT: carnitine acetyltransferase
